# Supplementary material for: Addressing the effects of soil organic carbon on water retention in US Pacific Northwest wheat–soil systems
Source: Frontiers journal article supplement (doi:10.3389/fsoil.2023.1233886), 2023-08-21
Supplement: Image_1.pdf [file Image_1.pdf]

## Supplementary material

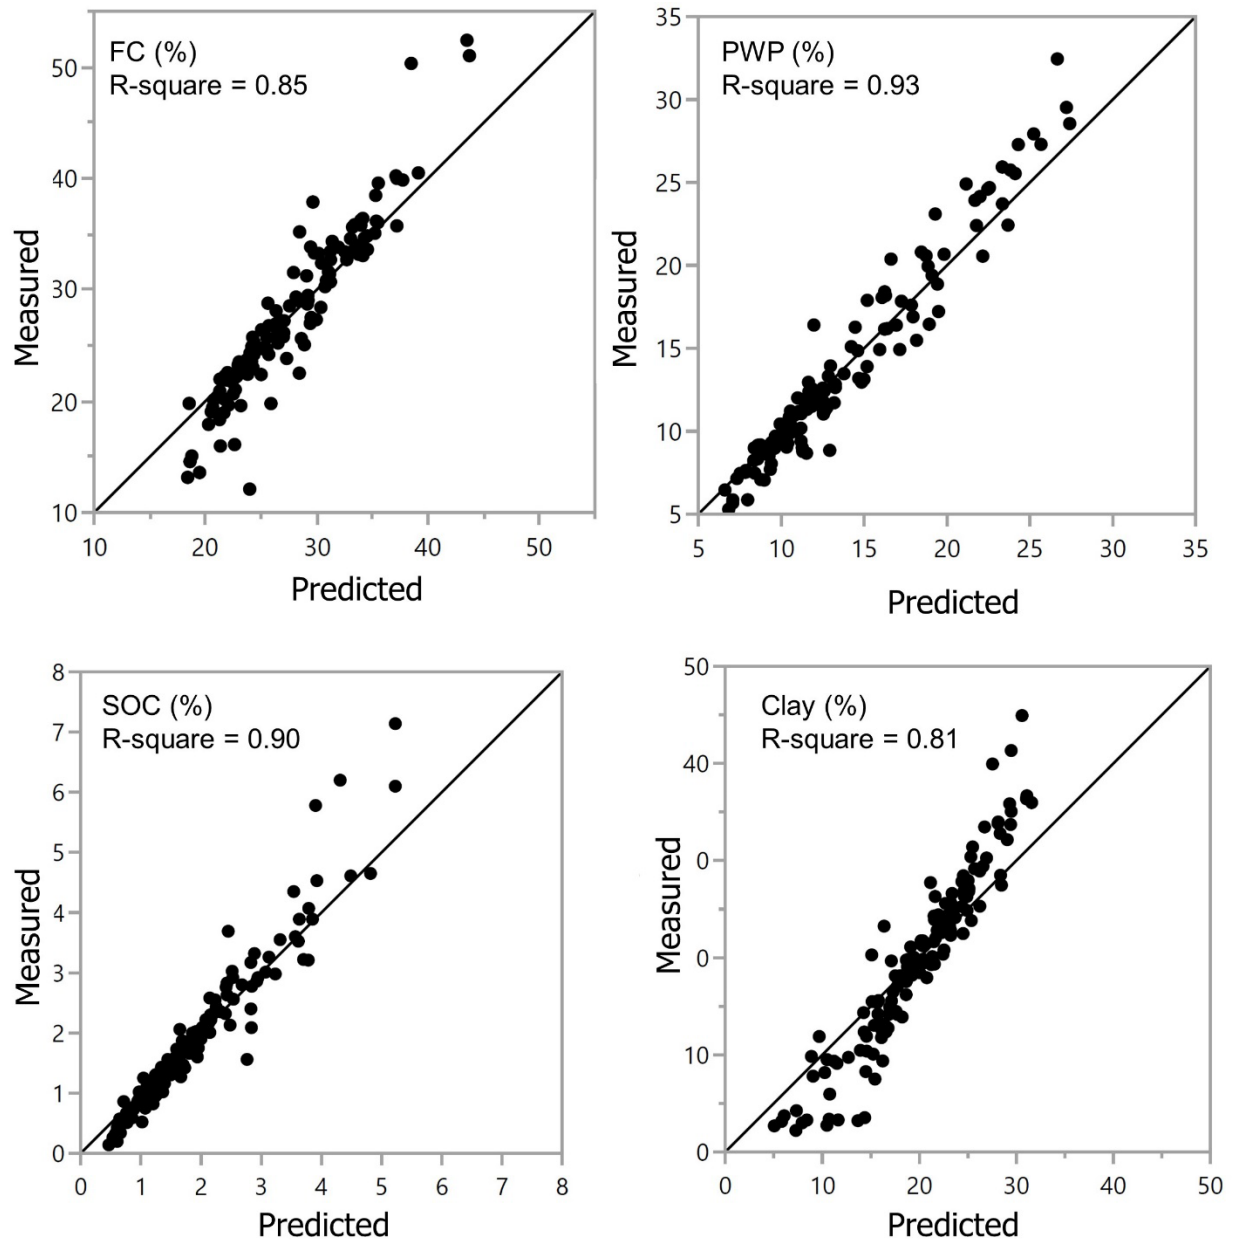

Supplementary Figure S1. Scatter plots for predicted and measured values obtained from calibrations using mid-infrared (MIR) spectroscopy coupled with random forest (RF) regression for field capacity –33 kPa (FC), permanent wilting point –1500 kPa (PWP), soil organic carbon (SOC) and clay
